# Supplementary material for: An immune stratification reveals a subset of PD-1/LAG-3 double-positive triple-negative breast cancers
Source: Springer Nature journal article supplement (doi:10.1186/s13058-016-0783-4), 2016-12-01
Supplement: MOESM1 [file 11108934]

**Table S1** Patient characteristics

| <b>Clinical and pathological information</b> | <b>Discovery cohort</b> | <b>Validation cohort</b> |
|----------------------------------------------|-------------------------|--------------------------|
| <b>Patients (n)</b>                          | 259                     | 104                      |
| <b>Median age: years (IQR)</b>               | 50 (46 – 68)            | 53 (47 – 68)             |
| <b>Median tumor size: mm (IQR)</b>           | 20 (14.5 – 35)          | 20 (15 – 45)             |
| <b>T stage</b>                               |                         |                          |
| T1                                           | 135 (52.1%)             | 52 (50.0%)               |
| T2                                           | 94 (36.3%)              | 30 (28.8%)               |
| T3                                           | 21 (8.1%)               | 17 (16.4%)               |
| T4                                           | 9 (3.5%)                | 5 (4.8%)                 |
| <b>TNM Stage</b>                             |                         |                          |
| I                                            | 78 (30.1%)              | 28 (26.9%)               |
| II                                           | 99 (38.2%)              | 40 (38.5%)               |
| III                                          | 82 (31.7%)              | 36 (34.6%)               |
| <b>Node status</b>                           |                         |                          |
| Negative                                     | 125 (48.3%)             | 53 (51.0%)               |
| Positive                                     | 134 (51.7%)             | 51 (49.0%)               |
| <b>Histological grade</b>                    |                         |                          |
| grade 1                                      | 3 (1.2%)                | 1 (1.0%)                 |
| grade 2                                      | 52 (20.1%)              | 39 (37.5%)               |
| grade 3                                      | 204 (78.7%)             | 64 (61.5%)               |
| <b>Lymphovascular invasion</b>               |                         |                          |
| Absent                                       | 113 (43.6%)             | -                        |
| Present                                      | 78 (30.1%)              | -                        |
| Unknown                                      | 68 (26.3%)              | 104 (100%)               |
| <b>Recurrence within 36 months</b>           |                         |                          |
| Yes                                          | 65 (25.1%)              | 14 (13.5%)               |
| No                                           | 194 (74.9%)             | 90 (86.5%)               |
| <b>TILs</b>                                  |                         |                          |
| Median (range)                               | 10 (0 – 75)             | 10 (0 – 75)              |
| IQR                                          | 2 – 25                  | 1 – 25                   |
| <b>TIL scores</b>                            |                         |                          |
| 0                                            | 64 (24.7%)              | 27 (26.0%)               |
| 10                                           | 102 (39.4%)             | 28 (26.9%)               |
| 20                                           | 21 (8.1%)               | 14 (13.5%)               |
| 30                                           | 29 (11.1%)              | 19 (18.3%)               |
| 40                                           | 15 (5.8%)               | 6 (5.8%)                 |
| 50                                           | 10 (3.9%)               | 2 (1.9%)                 |
| 60                                           | 10 (3.9%)               | 5 (4.8%)                 |
| 70                                           | 2 (0.8%)                | 1 (1.0%)                 |
| 80                                           | 6 (2.3%)                | 2 (1.9%)                 |
| 90                                           | 0 (0.0%)                | 0 (0.0%)                 |
| 100                                          | 0 (0.0%)                | 0 (0.0%)                 |

*N* number, *IQR* Interquartile range, *TILs* tumor-infiltrating lymphocytes

**Table S2** Antibodies and immunostaining protocols.

| <b>Antibody</b> | <b>Type</b> | <b>Clone</b> | <b>Source</b> | <b>Dilution</b> | <b>Incubation</b> | <b>Positive controls</b> | <b>Antigen Retrieval</b> | <b>Detection system</b>   |
|-----------------|-------------|--------------|---------------|-----------------|-------------------|--------------------------|--------------------------|---------------------------|
| CD8             | Monoclonal  | C8/144B      | DAKO          | 1:100           | 30 min, RT        | Human tonsil             | Tris-EDTA, 20 min        | EnVision FLEX, 30 min, RT |
| CD4             | Monoclonal  | 4B12         | DAKO          | 1:100           | 30 min, RT        | Human tonsil             | Tris-EDTA, 20 min        | EnVision FLEX, 30 min, RT |
| FOXP3           | Monoclonal  | 236A/E7      | Abcam         | 1:200           | 1 h, RT           | Lymph node               | Tris-EDTA, 20 min        | MACH1, 30 min, RT         |
| PD-1            | Monoclonal  | NAT105       | Abcam         | 1:100           | 1 h, RT           | Lymph node               | Tris-EDTA, 20 min        | MACH1, 30 min, RT         |
| LAG-3           | Monoclonal  | 17B4         | LS Bio        | 1:200           | 1 h, RT           | Lymph node               | Citrate, 20 min          | MACH1, 30 min, RT         |

**Table S3** Associations between tumor-infiltrating lymphocytes and clinicopathological features in triple-negative breast cancer (n = 259)

| Characteristic of patients | Continuous TILs |                |          |              | CD4 |           |            |              | CD8 |           |            |              | FOXP3 |           |            |              |
|----------------------------|-----------------|----------------|----------|--------------|-----|-----------|------------|--------------|-----|-----------|------------|--------------|-------|-----------|------------|--------------|
|                            | n               | Median (range) | IQR      | <i>P</i>     | n   | High (%)  | Low (%)    | <i>P</i>     | n   | High (%)  | Low (%)    | <i>P</i>     | n     | High (%)  | Low (%)    | <i>P</i>     |
| <b>Age at diagnosis</b>    |                 |                |          |              |     |           |            |              |     |           |            |              |       |           |            |              |
| < 50                       | 135             | 10 (0 - 75)    | 2 – 25   | <i>0.765</i> | 135 | 60 (44.4) | 75 (55.6)  | <i>0.098</i> | 135 | 58 (43.0) | 77 (57.0)  | <i>0.386</i> | 135   | 55 (40.7) | 80 (59.3)  | <i>0.900</i> |
| ≥ 50                       | 124             | 10 (0 - 75)    | 1 – 23.5 |              | 124 | 42 (33.9) | 82 (66.1)  |              | 124 | 60 (48.4) | 64 (51.6)  |              | 124   | 52 (46.0) | 72 (54.0)  |              |
| <b>LN status</b>           |                 |                |          |              |     |           |            |              |     |           |            |              |       |           |            |              |
| Negative                   | 125             | 8 (0 - 72)     | 2 - 25   | <i>0.223</i> | 125 | 47 (37.6) | 78 (62.4)  | <i>0.612</i> | 125 | 62 (49.6) | 63 (50.4)  | <i>0.215</i> | 125   | 52 (41.6) | 73 (58.4)  | <i>1.000</i> |
| Positive                   | 134             | 10 (0 - 75)    | 1 - 20   |              | 134 | 55 (41.0) | 79 (59.0)  |              | 134 | 56 (41.8) | 78 (58.2)  |              | 134   | 55 (41.0) | 79 (59.0)  |              |
| <b>Histologic grade</b>    |                 |                |          |              |     |           |            |              |     |           |            |              |       |           |            |              |
| G1-2                       | 55              | 10 (0 - 72)    | 2 – 25   | <i>0.413</i> | 55  | 21 (38.2) | 34 (61.8)  | <i>0.878</i> | 55  | 25 (45.5) | 30 (54.5)  | <i>1.000</i> | 55    | 17 (30.9) | 38 (69.1)  | <i>0.090</i> |
| G3                         | 204             | 10 (0 - 75)    | 0 – 23.5 |              | 204 | 81(39.7)  | 123 (60.3) |              | 204 | 93 (45.6) | 111 (54.4) |              | 204   | 90 (44.1) | 114 (55.9) |              |
| <b>pTNM staging</b>        |                 |                |          |              |     |           |            |              |     |           |            |              |       |           |            |              |
| I-II                       | 177             | 10 (0 - 72)    | 2 – 25   | <i>0.338</i> | 177 | 74 (41.8) | 103 (58.2) | <i>0.275</i> | 177 | 85 (48.0) | 92 (52.0)  | <i>0.284</i> | 177   | 76 (42.9) | 101 (57.1) | <i>0.498</i> |
| III                        | 82              | 10 (0 - 75)    | 1 – 20   |              | 82  | 28 (34.1) | 54 (65.9)  |              | 82  | 33 (40.2) | 49 (59.8)  |              | 82    | 31 (37.8) | 51 (62.2)  |              |
| <b>Tumor size (mm)</b>     |                 |                |          |              |     |           |            |              |     |           |            |              |       |           |            |              |
| ≤ 20                       | 138             | 10 (0 - 75)    | 2 – 25   | <i>0.018</i> | 138 | 55 (39.9) | 83 (60.1)  | <i>0.899</i> | 138 | 71 (51.4) | 67 (48.6)  | <i>0.060</i> | 138   | 58 (42.0) | 80 (58.0)  | <i>0.800</i> |
| > 20                       | 120             | 8 (0 - 72)     | 1 – 13.5 |              | 120 | 46 (38.3) | 74 (61.7)  |              | 120 | 47 (39.2) | 73 (60.8)  |              | 120   | 48 (40.0) | 72 (60.0)  |              |
| <b>LVI</b>                 |                 |                |          |              |     |           |            |              |     |           |            |              |       |           |            |              |
| Absent                     | 113             | 8 (0 - 75)     | 2 – 23.5 | <i>0.860</i> | 113 | 47 (41.6) | 66 (58.4)  | <i>1.000</i> | 113 | 60 (53.1) | 53 (46.9)  | <i>0.056</i> | 113   | 58 (51.3) | 55 (48.7)  | <i>0.186</i> |
| Present                    | 78              | 10 (0 - 72)    | 1 – 17.5 |              | 78  | 33 (42.3) | 45 (57.7)  |              | 78  | 30 (38.5) | 48 (61.5)  |              | 78    | 32 (41.0) | 46 (59.0)  |              |

Significant *P*-values are given in italics.  
*N* number, *IQR* Interquartile range, *LN* lymph node, *LVI* lymphovascular invasion, *TILs* tumor-infiltrating lymphocytes, *FOXP3* forkhead box protein 3

**Table S4** Associations between tumor-infiltrating lymphocytes and clinicopathological features in triple-negative breast cancer (validation cohort; n = 104)

| Characteristic of patients | Continuous TILs |                |          |          | CD4 |           |           |          | CD8 |           |           |          | FOXP3 |           |           |          |
|----------------------------|-----------------|----------------|----------|----------|-----|-----------|-----------|----------|-----|-----------|-----------|----------|-------|-----------|-----------|----------|
|                            | n               | Median (range) | IQR      | <i>P</i> | n   | High (%)  | Low (%)   | <i>P</i> | n   | High (%)  | Low (%)   | <i>P</i> | n     | High (%)  | Low (%)   | <i>P</i> |
| <b>Age at diagnosis</b>    |                 |                |          |          |     |           |           |          |     |           |           |          |       |           |           |          |
| < 50                       | 51              | 12 (0 - 72)    | 1 – 30   | 0.507    | 51  | 16 (31.4) | 35 (68.6) | 0.266    | 51  | 16 (31.4) | 35 (68.6) | 0.831    | 51    | 8 (15.7)  | 43 (84.3) | 0.458    |
| ≥ 50                       | 53              | 10 (0 - 75)    | 2 – 23.5 |          | 53  | 11 (20.8) | 42 (79.2) |          | 53  | 15 (28.3) | 38 (71.7) |          | 53    | 12 (22.6) | 41 (77.4) |          |
| <b>LN status</b>           |                 |                |          |          |     |           |           |          |     |           |           |          |       |           |           |          |
| Negative                   | 53              | 10 (0 - 75)    | 1 – 25   | 0.860    | 53  | 15 (28.3) | 38 (71.7) | 0.657    | 53  | 20 (37.7) | 33 (62.3) | 0.088    | 53    | 10 (18.9) | 43 (81.1) | 1.000    |
| Positive                   | 51              | 10 (0 - 62)    | 2 – 25   |          | 51  | 12 (23.5) | 39 (76.5) |          | 51  | 11 (21.6) | 40 (78.4) |          | 51    | 10 (19.6) | 41 (80.4) |          |
| <b>Histologic grade</b>    |                 |                |          |          |     |           |           |          |     |           |           |          |       |           |           |          |
| G1-2                       | 40              | 10 (0 - 75)    | 1 – 21.7 | 0.288    | 40  | 13 (32.5) | 27 (67.5) | 0.256    | 40  | 14 (35.0) | 26 (65.0) | 0.385    | 40    | 8 (20.0)  | 32 (80.0) | 1.000    |
| G3                         | 64              | 11 (0 - 62)    | 2 – 28.7 |          | 64  | 14 (21.9) | 50 (78.1) |          | 64  | 17 (26.6) | 47 (73.4) |          | 64    | 12 (18.8) | 52 (81.2) |          |
| <b>pTNM staging</b>        |                 |                |          |          |     |           |           |          |     |           |           |          |       |           |           |          |
| I-II                       | 68              | 10 (0 - 75)    | 1 – 28.7 | 0.978    | 68  | 18 (26.5) | 50 (73.5) | 1.000    | 68  | 22 (32.4) | 46 (67.6) | 0.504    | 68    | 12 (17.6) | 56 (82.4) | 0.607    |
| III                        | 36              | 10 (0 - 60)    | 2.7 – 25 |          | 36  | 9 (25.0)  | 27 (75.0) |          | 36  | 9 (25.0)  | 27 (75.0) |          | 36    | 8 (22.2)  | 28 (77.8) |          |
| <b>Tumor size (mm)</b>     |                 |                |          |          |     |           |           |          |     |           |           |          |       |           |           |          |
| ≤ 20                       | 54              | 13.5 (0 - 72)  | 1.7 – 30 | 0.039    | 54  | 18 (33.3) | 36 (66.7) | 0.116    | 54  | 20 (37.0) | 34 (63.0) | 0.133    | 54    | 14 (25.9) | 40 (74.1) | 0.085    |
| > 20                       | 50              | 5 (0 - 75)     | 1 – 20.2 |          | 50  | 9 (18.0)  | 41 (82.0) |          | 50  | 11 (22.0) | 39 (78.0) |          | 50    | 6 (12.0)  | 44 (88.0) |          |

Significant *P*-values are given in italics.  
*N* number, *IQR* Interquartile range, *LN* lymph node, *LVI* lymphovascular invasion, *TILs* tumor-infiltrating lymphocytes, *FOXP3* forkhead box protein 3

**Table S5** Univariate Cox regression analysis of FOXP3 for relapse-free survival and overall survival in triple negative breast cancer (n = 259) stratified by CD8+ tumor-infiltrating lymphocytes status

| Variable                     | TNBC with high CD8+ TILs |             |          | TNBC with low CD8+ TILs |             |          |
|------------------------------|--------------------------|-------------|----------|-------------------------|-------------|----------|
|                              | HR                       | 95% CI      | P value  | HR                      | 95% CI      | P value  |
| <b>Relapse-Free Survival</b> |                          |             |          |                         |             |          |
| <b>FOXP3</b>                 | 0.49                     | 0.21 – 1.16 | 1.04E-01 | 1.04                    | 0.47 – 2.35 | 9.14E-01 |
| <b>Overall Survival</b>      |                          |             |          |                         |             |          |
| <b>FOXP3</b>                 | 0.49                     | 0.21 – 1.15 | 1.03E-01 | 1.20                    | 0.53 – 2.72 | 6.58E-01 |

HR hazard ratio, CI confidence interval, FOXP3 forkhead box protein 3
